1 TITLE: Consumption of artificially sweetened beverages during pregnancy impacts infant gut  
2 microbiota and body mass index

3  
4 Isabelle Laforest-Lapointe<sup>\*1,2,3,4,5</sup>, Allan B. Becker<sup>6</sup>, Piushkumar J. Mandhane<sup>7</sup>, Stuart E.  
5 Turvey<sup>8</sup>, Theo J. Moraes<sup>9</sup>, Malcolm R. Sears<sup>10</sup>, Padmaja Subbarao<sup>9</sup>, Laura K. Sycuro<sup>5,11</sup>, Meghan  
6 B. Azad<sup>\*6</sup>, and Marie-Claire Arrieta<sup>\*1,2,4,5</sup>

7  
8 <sup>1</sup>University of Calgary, Physiology and Pharmacology, Calgary, Alberta, Canada  
9 <sup>2</sup>University of Calgary, Pediatrics, Calgary, Alberta, Canada  
10 <sup>3</sup>Université de Sherbrooke, Biologie, Sherbrooke, Québec, Canada  
11 <sup>4</sup>Alberta Children's Hospital Research Institute (ACHRI), Calgary, Alberta, Canada  
12 <sup>5</sup>University of Calgary, Snyder Institute for Chronic Diseases, Calgary, Alberta, Canada  
13 <sup>6</sup>University of Manitoba, Pediatrics and Child Health, Winnipeg, Manitoba, Canada  
14 <sup>7</sup>University of Alberta, Pediatrics, Edmonton, Alberta, Canada  
15 <sup>8</sup>The University of British Columbia, British Columbia Children's Hospital, Vancouver, British  
16 Columbia, Canada  
17 <sup>9</sup>University of Toronto, Pediatrics, Toronto, Ontario, Canada  
18 <sup>10</sup>McMaster University, Medicine, Hamilton, Ontario, Canada  
19 <sup>11</sup>University of Calgary, Microbiology, Immunology, and Infectious Diseases, Calgary, Alberta,  
20 Canada  
21 <sup>\*</sup>Corresponding Authors

22 Corresponding author e-mail: [Isabelle.laforest-lapointe@usherbrooke.ca](mailto:Isabelle.laforest-lapointe@usherbrooke.ca);

23 [Meghan.Azad@umanitoba.ca](mailto: Meghan.Azad@umanitoba.ca); [marie.arrieta@ucalgary.ca](mailto:marie.arrieta@ucalgary.ca)

24 **ABSTRACT**

25 Artificial sweetener consumption by pregnant women has been associated with an increased risk  
26 of infant obesity, but the underlying mechanisms are unknown. We aimed to determine if  
27 maternal consumption of artificially sweetened beverages (ASB) during pregnancy is associated  
28 with modifications of infant gut bacterial community composition during the first year of life,  
29 and whether these alterations are linked with infant body mass index (BMI) at one year of age.  
30 This research included 100 infants from the prospective Canadian CHILD Cohort Study, selected  
31 based on maternal ASB consumption during pregnancy (50 non-consumers and 50 daily  
32 consumers). We identified four microbiome clusters, of which two recapitulated the maturation  
33 trajectory of the infant gut bacterial communities from immature to mature and two deviated  
34 from this trajectory. Maternal ASB consumption was associated with the depletion of several  
35 *Bacteroides* sp. and higher infant BMI. As we face an unprecedented rise in childhood obesity,  
36 future studies should evaluate the causal role of gut microbiota in the association between  
37 maternal ASB consumption, infant development and metabolism, and body composition.

## 38 INTRODUCTION

39 Childhood obesity in the United States increased from 5 to 18.5 percent between 1978 and  
40 2016<sup>1</sup>, magnifying the risk of cardiometabolic disease and mental health disorders later in life<sup>2</sup>.  
41 Recent work from the CHILD Cohort Study showed that maternal consumption of artificially  
42 sweetened beverages (ASB) during pregnancy is associated with higher infant body mass index  
43 (BMI) at one year of age<sup>3</sup>. Importantly, this association was independent of key obesity risk  
44 factors, such as maternal BMI, smoking, poor diet, diabetes, short breastfeeding duration, and  
45 earlier introduction of solid food<sup>3</sup>. Similar associations have been reported in several other  
46 prospective birth cohorts<sup>4</sup>, but the underlying mechanism has not been studied.

47 The gastrointestinal tract, a key site for host metabolic regulation<sup>5,6</sup>, is colonized by a vast  
48 community of microbes including bacteria, viruses, and micro-eukaryotes<sup>7</sup>. The gut microbiome  
49 is highly heterogeneous during infancy, characterized by colonization patterns<sup>8-10</sup> that are  
50 influenced by the maternal microbiome<sup>11,12</sup>, method of birth<sup>13-15</sup>, infant nutrition (breast milk or  
51 formula)<sup>16-18</sup>, and antibiotic treatment<sup>14,19</sup>. Simultaneously, important aspects of metabolic  
52 development occur during this period of life, many of which rely on interactions between  
53 microbes and host cells<sup>20</sup>. Recent studies in mice show that artificial sweetener consumption  
54 during pregnancy predisposes offspring to increased weight gain through behavioral (i.e.  
55 preference for sweet foods, appetite increase) and physiological mechanisms (i.e. stimulation of  
56 intestinal sugar absorption, increased postnatal weight gain, altered lipid profiles,  
57 downregulation of hepatic detoxification, and increased insulin resistance)<sup>21-24</sup>. Suez *et al.*<sup>25</sup>  
58 demonstrated that artificial sweetener consumption in adult mice directly impacts gut  
59 microbiome composition and function, leading to an increase in host glucose intolerance. More  
60 recently, Stichelen *et al.*<sup>24</sup> addressed gestational exposure to artificial sweeteners, finding

61 changes in bacterial metabolites and an decrease in *Akkermansia muciphila* in the pups' gut  
62 microbiome. However, the consequences of maternal artificial sweetener consumption during  
63 pregnancy on the infant gut microbiota has not been reported in humans.

64 To address this knowledge gap and build on our prior observations in the CHILD Cohort  
65 Study, we evaluated the association of maternal artificially sweetened beverage (ASB)  
66 consumption during pregnancy with the infant gut microbiota in a subset of 100 infants (50 with  
67 daily maternal ASB consumption during pregnancy and 50 unexposed controls). We employed  
68 next generation sequencing of the 16S rRNA amplicon gene combined with a community typing  
69 analysis (Dirichlet Multinomial Mixtures [DMM] modelling)<sup>26</sup> to understand if ASB intake was  
70 associated with a shift in infant microbiota composition that might explain the relationship  
71 between maternal ASB intake during pregnancy and infant BMI at one year of age.

72

## 73 **METHODS**

### 74 *Study design and population*

75 We used data and samples collected through the CHILD Cohort Study<sup>27,28</sup>, a Canadian general  
76 population birth cohort (3621 families recruited across four provinces) including singleton  
77 pregnancies (>35 weeks gestational age with no congenital abnormalities) enrolled from 2008 to  
78 2012. From this cohort, we completed a case-control study by selecting 100 infants divided  
79 equally between mothers that reported little or no ASB consumption (less than one per month) or  
80 high ASB consumption (one or more per day) during pregnancy. The groups were balanced for  
81 six potential confounding factors known to influence the gut microbiome: infant sex, birth mode,  
82 breastfeeding at three and 12 months, maternal BMI, and antibiotic use in infants before 12  
83 months (antibiotics before three months old was an exclusion criterion; eTable 1). To

84 characterize the gut microbiome, stool samples were acquired at three and 12 months of age for a  
85 total of 200 samples. This study was approved by the University of Calgary Conjoint Health  
86 Research Ethics Board (CHREB) and ethics committees at the Hospital for Sick Children, and  
87 the Universities of Manitoba, Alberta, and British Columbia. Written informed consent was  
88 obtained from mothers during enrollment to the CHILD Study.

89

### 90 *Maternal diet in pregnancy*

91 Maternal dietary assessment in pregnancy has previously been described<sup>3</sup>. Briefly, a food  
92 frequency questionnaire (FFQ) was completed during the second or third trimester and ASB  
93 consumption was evaluated using reports of “diet soft drinks or pop” (i.e. soda)  
94 (serving = 12 oz / one can) and “artificial sweetener added to tea or coffee” (serving = 1 packet).  
95 Other dietary variables included: sugar-sweetened beverages, Healthy Eating Index (HEI) total  
96 score (see eMethods), added sugar and total energy intake.

97

### 98 *Infant BMI*

99 BMI was measured by CHILD staff to the nearest 0.1 kg around one year of age (mean = 12.0  
100 months  $\pm$  0.8 [sd]) and height to the nearest 0.1 cm. Age- and sex-specific BMI-for-age z-scores  
101 were calculated following the World Health Organization reference<sup>29</sup>.

102

### 103 *Other variables*

104 The following variables were considered in univariable analyses (see eMethods): (1) infant’s sex,  
105 age at sample collection, breastfeeding duration (BF duration; months), breastfeeding status at  
106 three months (BF at 3M; yes or no), diet at three and six months (Diet at 3M and Diet at 6M;

107 both defined in 8 categories allocated based on the presence in the infant's diet of breastfeeding,  
108 formula, and solids), solids at three and six months (Solids at 3M and Solids at 6M), formula  
109 feeding at three months (FF at 3M), number of antibiotic treatments received from six to twelve  
110 months (Child 6-12 abx), and secretor status (determined from the single nucleotide  
111 polymorphism rs601338 in the *FUT2* gene); (2) mother's gestational diabetes, age, ethnicity,  
112 education, oral antibiotics received pre-delivery (Mother pre-delivery abx), intrapartum  
113 antibiotics (Mother intrapartum abx), and secretor status (rs601338 SNP); (3) study site, presence  
114 of cats, dogs, and older siblings in the house.

115

#### 116 *Stool samples DNA extraction and sequencing*

117 We extracted gut microbial DNA from fecal samples using the DNeasy PowerSoil kit  
118 (QIAGEN) according to the manufacturer's instructions. and amplified the V4 region of the 16S  
119 rRNA gene to generate ready-to-pool dual-indexed amplicon libraries as described previously<sup>30</sup>  
120 (see eMethods). Using the DADA2<sup>31</sup> pipeline, the final dataset contained 4,553,000 quality  
121 sequences, a mean (range) of 6,509 (22,995 - 68,265) sequences per sample identified as  
122 954 unique bacterial Amplicon Sequence Variants (ASVs). Samples contained a mean of 40 (10-  
123 95) unique ASVs per samples.

124

#### 125 *Statistical analysis*

126 We used Dirichlet Multinomial Mixtures (DMM) modelling<sup>26</sup> on 16S rRNA gene sequencing  
127 data to identify clusters of similar bacterial community structure amongst our samples (a  
128 technique known as community typing analysis, increasingly used in human microbiome  
129 studies<sup>10,32-34</sup>). This technique is increasingly employed in microbiome studies for three reasons:

130 (1) identification of unique microbial clusters is unsupervised; (2) cluster size depends on  
131 metacommunity variability; and (3) adequate explicit probabilistic model penalises model  
132 complexity to optimize cluster number. The lowest Laplace approximation grouped our samples  
133 in four unique clusters (Figure 1-2 and eFigure 1).

134 The distribution of variables as well as the variation in bacterial richness (Chao 1), alpha-  
135 diversity (Shannon index), and community evenness (Shannon index /  $\log_n(\text{species richness})$ )  
136 across the DMM clusters were examined by non-parametric Kruskal-Wallis tests followed by  
137 post-hoc Dunn tests or generalized linear models (glm) with a binomial/logistic distribution. To  
138 explore the changes in taxonomical community structure at a fine scale, we tested for significant  
139 differences in the relative abundance of the 10 most dominant bacterial genera across clusters  
140 using non-parametric Kruskal-Wallis tests followed by post-hoc Dunn tests with Benjamin-  
141 Holmes False Discovery Rate (FDR) correction. To account for potential heteroskedasticity in  
142 bacterial community dispersion between groups and avoid the loss of information through  
143 rarefaction<sup>35</sup>, we performed a variance stabilizing transformation<sup>35,36</sup> prior to any statistical tests  
144 on beta-diversity. To select variables that could be drivers of infant gut bacterial community  
145 structure, we tested for correlations between our variables and community scores on the Principal  
146 Component Analysis (PCoA) ordination axes in univariable models (*envfit* function of *vegan*<sup>37</sup>).  
147 The relative influence of the significant drivers of gut bacterial community structure was then  
148 assessed statistically in multivariate models using a Permutational Multivariate Analysis Of  
149 Variance (PERMANOVA; *adonis* function of *vegan*<sup>37</sup>) with 999 permutations and visualized  
150 using PCoAs based on Bray-Curtis dissimilarities. We used DESeq2 to test for differentially  
151 abundant bacterial taxa according to maternal ASB consumption on the 100 most relatively  
152 abundant bacterial taxa to limit spurious significance driven by very rare ASVs. Finally, we used

153 linear models on the three- and twelve-months-old samples to test for the influence of maternal  
154 ASB consumption and microbial ordination axes (PCoA1 and PCoA2) on infant BMI z-score.  
155 The full model's formula was the following:

156 
$$[ \text{Infant BMI} \sim \text{ASB} + \text{PCoA1} + \text{PCoA2} ]$$

157 All analyses and graphs were computed in R version 3.6.1 (R Development Core Team;  
158 <http://www.R-project.org>).

159

## 160 **RESULTS**

### 161 *Microbiome clusters*

162 We performed community typing analysis based on Dirichlet Multinomial Mixtures (DMM)  
163 modelling<sup>26</sup> to identify clusters of similar bacterial community structure amongst our samples.  
164 Based on their microbiota composition, the infant fecal samples clustered in four groups  
165 (Figure 1-2 and eFigure 1). Gut bacterial species richness (Figure 1B), alpha- (Figure 1C) and  
166 beta-diversity (Figure 1A) and taxonomic composition (Figure 2) differed between clusters,  
167 reflecting broad community differences. Clusters 1 and 4 comprised microbial communities  
168 reflecting the well-described effect of temporal maturation during the first year of life; with  
169 cluster 1 comprising only three-month (3M) samples and cluster 4 comprising almost exclusively  
170 twelve-month (12M) samples. Clusters 2 and 3 comprised a mixture of 3M and 12M samples.  
171 Compared to the other three clusters, cluster 1 showed a higher proportion of exclusive  
172 breastfeeding. Cluster 3 included a higher proportion of mothers receiving antibiotics, infants  
173 born by C-section and formula feeding (Figure 1). However, there was no difference in maternal  
174 ASB consumption between clusters, suggesting that this exposure did not influence the  
175 compositional differences that drove cluster classification (Figure 1F). In addition, the clusters



176 did not differ in terms of maternal sugar intake, gestational diabetes, age, parity, ethnicity,  
177 education, antibiotics, study site, infant antibiotics, or infant or mother secretor status.

178

179 *Relative influence of ASB on microbial community structure*

180 *Enyfit* analysis (univariable models) identified thirteen variables as significant drivers of gut  
181 bacterial beta-diversity from which we selected eight non-redundant variables to build our  
182 models: infant age, maternal intrapartum antibiotics, maternal ethnicity, birth mode,  
183 breastfeeding status at three months, presence of older siblings, infant secretor status, and  
184 maternal ASB consumption (Figure 3A and eFigure 2). Considering the complete dataset, the  
185 significant predictors were infant age, maternal ethnicity, intrapartum antibiotics, and birth  
186 mode. The same four variables, plus breastfeeding status at 3 months, were tested in a  
187 PERMANOVA (multivariable model), altogether explaining 14.2% of community variance  
188 (Table 1). Maternal ASB consumption was a significant predictor of infant gut bacterial  
189 composition only in the multivariable model ( $R^2 = 0.7\%$ ; Table 1). Birth mode (vaginal vs. C-  
190 section) had also a significant influence on community composition ( $R^2=0.8\%$ ), but to a lesser  
191 extent than infant age ( $R^2 = 7.3\%$ ) and mother's ethnicity ( $R^2 = 2.5\%$ ; Table 1).

192 Next, we repeated the beta-diversity analyses separately within each of the 4 clusters. *Enyfit*  
193 univariable models identified distinct drivers for each cluster (Figure 3A). Interestingly, the  
194 drivers of beta-diversity in cluster 1 (only 3M samples) were mainly maternal factors (i.e. birth  
195 mode, mother's ethnicity, intrapartum antibiotics) whereas the drivers of cluster 4 (mostly 12M)  
196 were infant factors (infant's secretor status, breastfeeding at three months, and infant age (Figure  
197 3A). Cluster 2 was the only cluster in which maternal ASB consumption was associated with

198 beta-diversity ( $R^2 = 3.2\%$ ), and this association was confirmed by the univariable (Figure 3A,  
199 eFigure 2) and multivariable (Table 1) analyses.

200 We tested for associations of specific bacterial features in the infant gut with maternal ASB  
201 consumption. In the complete dataset, we identified two ASVs associated with maternal  
202 consumption of ASB, one species being depleted (*Bacteroides* sp. ASV45, log2 fold  
203 change = -27.2 and another species enriched (*Prevotella copri* ASV42, 24.2) among infants  
204 exposed to high maternal ASB intake (Figure 3B). Repeating this test within each cluster, we  
205 identified 15 additional ASVs enriched or depleted. For cluster 2, one ASV was enriched  
206 (ASV19, *Akkermansia muciphila*, 24.9) and four depleted (*Bacteroides ovatus* ASV27, -25.9;  
207 *Parabacteroides* sp. ASV83, -25.2; *Bacteroides* sp. ASV45, -24.9; *Bacteroides* sp. ASV25, -10.7)  
208 with maternal ASB consumption (Figure 3B). All adjusted p-values were below 0.001.

209

#### 210 *Association of ASB and the microbiome with infant BMI at one-year-old*

211 Finally, using a multivariable linear model on the complete dataset, we tested the association of  
212 maternal ASB consumption and microbial community composition with infant BMI z-score at  
213 one year of age. Our results confirmed that daily maternal ASB consumption is associated with  
214 higher infant BMI ( $\beta$ -estimate = 0.42, 95%CI 0.03:0.80,  $P = 0.037$ ; Table 2), and showed that  
215 BMI was associated with the microbiome composition at 12 months (PCoA1 axis;  $\beta$ -estimate = -  
216 0.71, 95%CI -1.40:-0.01,  $P = 0.048$ ; Table 2) but not at three months (not shown). These results  
217 suggest that features of PCoA1 (i.e. lower relative abundance of *Bacteroidetes* and  
218 *Faecalibacterium*, and higher relative abundance of *Escherichia*, *Klebsiella*, *Bifidobacterium*,  
219 *Haemophilus*, *Clostridium*, and *Veillonella*; eFigure 3) are inversely associated with infant BMI.

## 220 **DISCUSSION**

221 In defining links between maternal ASB consumption and infant BMI, we provide new evidence  
222 suggesting that maternal consumption of ASB during pregnancy (1) influences the establishment  
223 of the infant gut microbiome, particularly in infants diverging from what has previously been  
224 described as the typical microbiome maturation trajectory (Table 1, Figure 3A); and (2) is  
225 associated with an increase in infant BMI at one-year-old (Table 2). To our knowledge, this is  
226 the first human study to report the impact of maternal consumption of ASB on the infant gut  
227 microbiome, and its potential influence on infant BMI. In light of recent data showing that ASB  
228 can drive dysregulation of energy metabolism in mice through changes in the gut  
229 microbiome<sup>24,25,38,39</sup>, our study suggests that infants exposed to ASB through their mothers may  
230 be at higher risk of shifts in microbial community structure related to early-life predisposition to  
231 metabolic diseases<sup>40,41</sup>.

232 In our study, broad shifts in bacterial community structure were significantly associated  
233 with infant BMI at one-year-old. We also identified 9 bacterial taxa from *Bacteroides* sp. that  
234 were enriched (3 ASVs) or depleted (6 ASVs) at high levels of maternal ASB consumption,  
235 suggesting a mechanism of influence on infant weight gain involving specific taxa of the gut  
236 microbiome. The taxa *Akkermansia muciphila* and genus *Bacteroides* have previously been  
237 identified by various studies to be respectively decreased and enriched as a consequence of ASB  
238 consumption<sup>25,38,39,42</sup>. Our results differ from previous findings for *A. muciphila* and suggest  
239 that *Bacteroides* patterns of enrichment or depletion might be species- or strain-specific,  
240 warranting further research with deeper resolution.

241 As reported by Bian *et al.*<sup>38,39</sup> in two studies with adult mice, and by Nettleton *et al.*<sup>43</sup> in a  
242 study on dams and their offspring, ASB have been shown to alter gut bacterial community

243 composition (increase of *Bacteroides* and reductions of *Lactobacillus* and *Clostridium*) and  
244 increase body weight in parallel with an enrichment of energy metabolism bacterial genes. The  
245 functional cluster analyses by Bian *et al.*<sup>38,39</sup> revealed activation of genes related to carbohydrate  
246 absorption and increases in metabolic pathways related to glycolysis and sugar and xylose  
247 transport<sup>38</sup>. Sucralose treatment resulted in an increase in bacterial pro-inflammatory mediator  
248 genes in mice<sup>39</sup>. Likewise, Chi *et al.*<sup>42</sup> found that consumption of the artificial sweetener  
249 neotame altered the alpha- and beta-diversity of mice gut microbiome, and led to a decrease in  
250 butyrate synthetic genes and changes to the fecal short chain fatty acids cluster. Overall,  
251 accumulating evidence suggests that the alterations of host gut bacterial community structure  
252 through the consumption of ASB is reflected in bacterial and host metabolic gene clusters, which  
253 might explain the increase in weight gain. Based on this evidence and our current results, we  
254 hypothesize that gestational exposure to ASB impacts infant gut bacterial communities either  
255 indirectly through disruption of vertical transmission of the maternal microbiome, or directly  
256 through lactation during breastfeeding. However, our study is underpowered to definitively  
257 assess whether gut microbiome mediate the relationship between maternal ASB and infant BMI.  
258 Additional work including functional evidence from metagenomics and metabolomics will  
259 determine if the bacterial taxa and compositional changes associated with high maternal ASB  
260 consumption in our study are causally implicated in energy metabolism dysregulation and infant  
261 body composition.

262 Overall, our study validates previous findings<sup>3</sup> that maternal consumption of artificial  
263 sweeteners is associated with a higher BMI at one-year-old, and provides unique and timely  
264 evidence that the infant gut microbiome could play a role in this effect, especially for susceptible  
265 infants displaying a disrupted maturation trajectory (reduced alpha-diversity and species

266 richness) of their gut microbiome and a high relative abundance of *Bacteroides*. Our study also  
267 confirms recent descriptions of infant microbiome development and confirms the influence of  
268 several known determinants of the gut microbiome during the first year of life<sup>11-14,16,17,19</sup>  
269 including maternal antibiotics, breastfeeding, birth mode and ethnicity.

270 The major strength of our study is the combination of state-of-the-art community typing  
271 analysis of the gut bacterial communities combined with the standardized prospective evaluation  
272 of maternal ASB consumption. Limitations of our study lie in risk of measurement error in self-  
273 reported dietary exposures and our inability to distinguish between different types of ASB or  
274 account for artificial sweeteners in foods. Also, we did not assess maternal diet after delivery, so  
275 we could not directly investigate the impact of prenatal ASB exposure *in utero* versus postnatal  
276 exposure through lactation<sup>46,47</sup>. In addition, we used 16S amplicon sequencing to characterize the  
277 gut bacterial communities. This method is limited in resolution as many recent studies have  
278 revealed that host-microbe and microbe-microbe interactions occur at as species and subspecies-  
279 level variants<sup>44,45</sup>. Finally, aside from the gut microbiome, various other physiological  
280 mechanisms are altered in rodent offspring after exposure to artificial sweeteners *in utero*<sup>21-24</sup>  
281 (i.e. intestinal sugar absorption stimulation, increased postnatal weight gain, altered lipid  
282 profiles, downregulation of hepatic detoxification, and increased adulthood insulin resistance).  
283 Although we were unable to explore these mechanisms in our study, they will be addressed by  
284 future work in the CHILD cohort involving metagenomics of infant stool and metabolomics of  
285 infant stool, urine and serum.

286 **CONCLUSION**

287 In this study, we characterized the infant gut microbiome of 100 infants and found evidence that  
288 maternal ASB consumption during pregnancy might have unforeseen effects on infant gut  
289 microbiome development and body mass index during the first year of life. As we face an  
290 unprecedented rise in childhood obesity and related metabolic diseases, further research is  
291 warranted to understand the impact of artificial sweeteners on gut microbiome and weight gain,  
292 especially during critical periods of early development.

293 **ARTICLE INFORMATION**

294

295 **Author contributions:** ABB, PJM, SET, TJM, MRS, and PS, coordinated the CHILD cohort  
296 and collected the data; MCA, MBA, and LKS designed the study and obtained funding; ILL and  
297 MCA analyzed the data; ILL, MCA, MBA, and LKS interpreted the results, wrote and edited the  
298 manuscript. All authors critically reviewed the manuscript and approved the final version for  
299 submission.

300

301 **Conflict of Interest Disclosures:** The authors state that they have no conflict of interest.

302

303 **Funding/Support:** The Canadian Institutes of Health Research (CIHR) and the AllerGen  
304 Network of Centres of Excellence provided core support for the CHILD Cohort Study. This  
305 research was specifically funded by a CIHR Operating Grant for the Secondary Analysis of  
306 Existing Cohort Data (#151530, co-PIs: MBA and MCA).

307 This research was supported, in part, by the Canada Research Chairs Program. MBA holds a Tier  
308 2 Canada Research Chair in the Developmental Origins of Chronic Disease and is a CIFAR  
309 Fellow in the Humans and the Microbiome Program; SET holds a Tier 1 Canada Research Chair  
310 in Pediatric Precision Health; ILL hold a Tier 2 Canada Research Chair in Applied Microbial  
311 Ecology.

312

313 **Role of the Funder/Sponsor:** The funders had no role in the design and conduct of the study;  
314 collection, management, analysis, and interpretation of the data; preparation, review, or approval  
315 of the manuscript; and decision to submit the manuscript for publication.

316

317 **Acknowledgements:** We are grateful to all the families who took part in this study and the  
318 whole Canadian Healthy Infant Longitudinal Development Study team, which includes  
319 interviewers, nurses, computer and laboratory technicians, clerical workers, research scientists,  
320 volunteers, managers, and receptionists. We also thank Alyssa Archibald, MD (University of  
321 Manitoba, Winnipeg, Manitoba, Canada), for her assistance with the literature review for this  
322 project, and Faisal Atakora, MSc (University of Manitoba), for statistical expertise.

323

324 **Data and Code Availability:** Raw sequences have been deposited on NCBI public repository  
325 (Bioproject #PRJNA624780). The R code, metadata, community matrix and taxa matrix are  
326 available on github.

327 **REFERENCES**

- 328 1. Hales CM, Carroll MD, Fryar CD, Ogden CL. Prevalence of Obesity Among Adults and  
329 Youth: United States, 2015-2016. *NCHS Data Brief*. 2017(288):1-8.
- 330 2. Daniels SR, Arnett DK, Eckel RH, et al. Overweight in children and adolescents:  
331 pathophysiology, consequences, prevention, and treatment. *Circulation*.  
332 2005;111(15):1999-2012.
- 333 3. Azad MB, Sharma AK, de Souza RJ, et al. Association Between Artificially Sweetened  
334 Beverage Consumption During Pregnancy and Infant Body Mass Index. *JAMA Pediatr*.  
335 2016;170(7):662-670.
- 336 4. Archibald AJ, Dolinsky VW, Azad MB. Early-Life Exposure to Non-Nutritive Sweeteners  
337 and the Developmental Origins of Childhood Obesity: Global Evidence from Human and  
338 Rodent Studies. *Nutrients*. 2018;10(2).
- 339 5. Cox LM, Blaser MJ. Pathways in microbe-induced obesity. *Cell Metab*. 2013;17(6):883-  
340 894.
- 341 6. Vatanen T, Franzosa EA, Schwager R, et al. The human gut microbiome in early-onset  
342 type 1 diabetes from the TEDDY study. *Nature*. 2018;562(7728):589-594.
- 343 7. Human Microbiome Project C. Structure, function and diversity of the healthy human  
344 microbiome. *Nature*. 2012;486(7402):207-214.
- 345 8. Yatsunenkov T, Rey FE, Manary MJ, et al. Human gut microbiome viewed across age and  
346 geography. *Nature*. 2012;486(7402):222-227.
- 347 9. Backhed F, Roswall J, Peng Y, et al. Dynamics and Stabilization of the Human Gut  
348 Microbiome during the First Year of Life. *Cell Host Microbe*. 2015;17(6):852.
- 349 10. Stewart CJ, Ajami NJ, O'Brien JL, et al. Temporal development of the gut microbiome in  
350 early childhood from the TEDDY study. *Nature*. 2018;562(7728):583-588.
- 351 11. Gomez de Agüero M, Ganai-Vonarburg SC, Fuhrer T, et al. The maternal microbiota  
352 drives early postnatal innate immune development. *Science*. 2016;351(6279):1296-  
353 1302.
- 354 12. Cabrera-Rubio R, Collado MC, Laitinen K, Salminen S, Isolauri E, Mira A. The human milk  
355 microbiome changes over lactation and is shaped by maternal weight and mode of  
356 delivery. *Am J Clin Nutr*. 2012;96(3):544-551.
- 357 13. Dominguez-Bello MG, Costello EK, Contreras M, et al. Delivery mode shapes the  
358 acquisition and structure of the initial microbiota across multiple body habitats in  
359 newborns. *Proc Natl Acad Sci U S A*. 2010;107(26):11971-11975.
- 360 14. Yassour M, Vatanen T, Siljander H, et al. Natural history of the infant gut microbiome  
361 and impact of antibiotic treatment on bacterial strain diversity and stability. *Sci Transl  
362 Med*. 2016;8(343):343ra381.
- 363 15. Madan JC, Hoen AG, Lundgren SN, et al. Association of Cesarean Delivery and Formula  
364 Supplementation With the Intestinal Microbiome of 6-Week-Old Infants. *JAMA Pediatr*.  
365 2016;170(3):212-219.
- 366 16. Palmer C, Bik EM, DiGiulio DB, Relman DA, Brown PO. Development of the human infant  
367 intestinal microbiota. *PLoS Biol*. 2007;5(7):e177.
- 368 17. Round JL, Lee SM, Li J, et al. The Toll-like receptor 2 pathway establishes colonization by  
369 a commensal of the human microbiota. *Science*. 2011;332(6032):974-977.



- 370 18. Pannaraj PS, Li F, Cerini C, et al. Association Between Breast Milk Bacterial Communities  
371 and Establishment and Development of the Infant Gut Microbiome. *JAMA Pediatr.*  
372 2017;171(7):647-654.
- 373 19. Zeissig S, Blumberg RS. Life at the beginning: perturbation of the microbiota by  
374 antibiotics in early life and its role in health and disease. *Nature immunology.*  
375 2014;15(4):307-310.
- 376 20. Round JL, Mazmanian SK. The gut microbiota shapes intestinal immune responses  
377 during health and disease. *Nat Rev Immunol.* 2009;9(5):313-323.
- 378 21. von Poser Toigo E, Huffell AP, Mota CS, Bertolini D, Pettenuzzo LF, Dalmaz C. Metabolic  
379 and feeding behavior alterations provoked by prenatal exposure to aspartame. *Appetite.*  
380 2015;87:168-174.
- 381 22. Collison KS, Makhoul NJ, Zaidi MZ, et al. Gender dimorphism in aspartame-induced  
382 impairment of spatial cognition and insulin sensitivity. *PLoS One.* 2012;7(4):e31570.
- 383 23. Zhang G-H, Chen M-L, Liu S-S, et al. Effects of mother's dietary exposure to acesulfame-K  
384 in pregnancy or lactation on the adult offspring's sweet preference. *Chemical senses.*  
385 2011;36(9):763-770.
- 386 24. Stichelen O-V, Rother KI, Hanover JA. Maternal exposure to non-nutritive sweeteners  
387 impacts progeny's metabolism and microbiome. *Frontiers in Microbiology.*  
388 2019;10:1360.
- 389 25. Suez J, Korem T, Zeevi D, et al. Artificial sweeteners induce glucose intolerance by  
390 altering the gut microbiota. *Nature.* 2014;514(7521):181-186.
- 391 26. Holmes I, Harris K, Quince C. Dirichlet multinomial mixtures: generative models for  
392 microbial metagenomics. *PLoS One.* 2012;7(2):e30126.
- 393 27. Subbarao P, Anand SS, Becker AB, et al. The Canadian Healthy Infant Longitudinal  
394 Development (CHILD) Study: examining developmental origins of allergy and asthma.  
395 *Thorax.* 2015;70(10):998-1000.
- 396 28. Takaro TK, Scott JA, Allen RW, et al. The Canadian Healthy Infant Longitudinal  
397 Development (CHILD) birth cohort study: assessment of environmental exposures. *J*  
398 *Expo Sci Environ Epidemiol.* 2015;25(6):580-592.
- 399 29. Group WHOMGRS. WHO Child Growth Standards based on length/height, weight and  
400 age. *Acta Paediatr Suppl.* 2006;450:76-85.
- 401 30. Kozich JJ, Westcott SL, Baxter NT, Highlander SK, Schloss PD. Development of a dual-  
402 index sequencing strategy and curation pipeline for analyzing amplicon sequence data  
403 on the MiSeq Illumina sequencing platform. *Appl Environ Microbiol.* 2013;79(17):5112-  
404 5120.
- 405 31. Callahan BJ, McMurdie PJ, Rosen MJ, Han AW, Johnson AJ, Holmes SP. DADA2: High-  
406 resolution sample inference from Illumina amplicon data. *Nat Methods.* 2016;13(7):581-  
407 583.
- 408 32. Fujimura KE, Sitarik AR, Havstad S, et al. Neonatal gut microbiota associates with  
409 childhood multisensitized atopy and T cell differentiation. *Nat Med.* 2016;22(10):1187-  
410 1191.
- 411 33. Ding T, Schloss PD. Dynamics and associations of microbial community types across the  
412 human body. *Nature.* 2014;509(7500):357-360.

- 413 34. McFall-Ngai M, Hadfield MG, Bosch TC, et al. Animals in a bacterial world, a new  
414 imperative for the life sciences. *Proc Natl Acad Sci U S A*. 2013;110(9):3229-3236.
- 415 35. McMurdie PJ, Holmes S. Waste not, want not: why rarefying microbiome data is  
416 inadmissible. *PLoS Comput Biol*. 2014;10(4):e1003531.
- 417 36. Anders S, Huber W. Differential expression analysis for sequence count data. *Genome*  
418 *Biol*. 2010;11(10):R106.
- 419 37. Oksanen J, Blanchet FG, Kindt R, et al. Package 'vegan'. *Community ecology package,*  
420 *version*. 2013;2(9).
- 421 38. Bian X, Chi L, Gao B, Tu P, Ru H, Lu K. The artificial sweetener acesulfame potassium  
422 affects the gut microbiome and body weight gain in CD-1 mice. *PLoS One*.  
423 2017;12(6):e0178426.
- 424 39. Bian X, Chi L, Gao B, Tu P, Ru H, Lu K. Gut Microbiome Response to Sucralose and Its  
425 Potential Role in Inducing Liver Inflammation in Mice. *Front Physiol*. 2017;8:487.
- 426 40. Pereira TJ, Moyce BL, Kereliuk SM, Dolinsky VW. Influence of maternal overnutrition and  
427 gestational diabetes on the programming of metabolic health outcomes in the offspring:  
428 experimental evidence. *Biochem Cell Biol*. 2015;93(5):438-451.
- 429 41. Symonds ME, Sebert SP, Hyatt MA, Budge H. Nutritional programming of the metabolic  
430 syndrome. *Nat Rev Endocrinol*. 2009;5(11):604-610.
- 431 42. Chi L, Bian X, Gao B, et al. Effects of the Artificial Sweetener Neotame on the Gut  
432 Microbiome and Fecal Metabolites in Mice. *Molecules*. 2018;23(2).
- 433 43. Nettleton JE, Cho NA, Klancic T, et al. Maternal low-dose aspartame and stevia  
434 consumption with an obesogenic diet alters metabolism, gut microbiota and mesolimbic  
435 reward system in rat dams and their offspring. *Gut*. 2020.
- 436 44. Lloyd-Price J, Mahurkar A, Rahnavard G, et al. Strains, functions and dynamics in the  
437 expanded Human Microbiome Project. *Nature*. 2017;550(7674):61-66.
- 438 45. Costea PI, Coelho LP, Sunagawa S, et al. Subspecies in the global human gut microbiome.  
439 *Mol Syst Biol*. 2017;13(12):960.
- 440 46. Rother KI, Sylvetsky AC, Walter PJ, Garraffo HM, Fields DA. Pharmacokinetics of  
441 Sucralose and Acesulfame-Potassium in Breast Milk Following Ingestion of Diet Soda. *J*  
442 *Pediatr Gastroenterol Nutr*. 2018;66(3):466-470.
- 443 47. Sylvetsky AC, Gardner AL, Bauman V, et al. Nonnutritive Sweeteners in Breast Milk. *J*  
444 *Toxicol Environ Health A*. 2015;78(16):1029-1032.
- 445 48. Komaroff AL. The Microbiome and Risk for Obesity and Diabetes. *JAMA*.  
446 2017;317(4):355-356.
- 447

448 **FIGURE LEGENDS**

449

450 **Figure 1. Discrepancies in covariate distribution, alpha- and beta-diversity between**  
451 **clusters.**

452 (A) Principal component analysis (PCoA) ordinations of variation in beta-diversity of infant gut  
453 bacterial communities based on Bray-Curtis dissimilarities among samples. Ellipses represent  
454 95% confidence intervals. (B-C) Box plots showing the alpha-diversity (richness and Shannon's  
455 diversity) per DMM cluster. The central line denotes the median, the boxes cover the 25th and  
456 75th percentiles, and the whiskers extend to the most extreme data point, which is no more than  
457 1.5 times the length of the box away from the box. Points outside the whiskers represent outlier  
458 samples. Letters denoted significant differences (non-parametric Kruskal-Wallis test followed by  
459 post-hoc test of Dunn with FDR correction following Benjamini-Hochberg method;  $P < 0.05$ ). (D-  
460 K) Variable distribution between clusters tested with non-parametric Kruskal-Wallis test  
461 followed by either a post-hoc generalized linear model (glm) with a binomial/logistic distribution  
462 (D-I) or (J-K) a post-hoc Dunn test with FDR correction following Benjamini-Hochberg method.  
463 Minuscule letters indicate statistical differences between clusters from post-hoc generalized  
464 linear model (glm) with a binomial/logistic distribution. "BF at 3M" stands for "breastfeeding at  
465 three months" and "FF at 3M" for "formula feeding at three months". Aside from maternal ASB  
466 consumption (F), only the variables that showed a statistical difference in distribution between  
467 clusters are presented. No differences were found for maternal age, ethnicity, education,  
468 diabetes; study site, household pets, siblings, or introduction of solid foods at 3 or 6 months.  
469 Cluster 1 included 48 samples from 48 infants; cluster 2 included 59 samples from 49 infants;

470 cluster 3 included 47 samples from 39 infants; and cluster 4 included 44 samples from 43 infants.

471 See methods for definition of variables.

472

473 **Figure 2. Differences in relative abundances of the dominant bacterial genera between**  
474 **clusters.**

475 (A-J) Relative abundance across DMM clusters of the ten most dominant bacterial genera and

476 (K) of the 15 most dominant bacterial genera. Letters indicate significant differences between

477 clusters (non-parametric Kruskal-Wallis test, post-hoc Dunn test with Benjamini-Hochberg FDR

478 correction). Cluster 1 contains only three months of age. Cluster 2 and 3 are composed of a mix

479 three and twelve months of age, and Cluster 4 only 12M (except two samples).

480

481 **Figure 3. Drivers of gut bacterial beta-diversity and indicator taxa associated with**  
482 **maternal consumption of ASB differ between clusters.**

483 (A) Univariate models showing significance and explained variance of 10 variables on bacterial

484 community structure across all data and each cluster subset. Horizontal bars show the amount of

485 variance ( $R^2$ ) explained by each covariate in the model as determined by *envfit*. Asterisk denotes

486 the significant covariates in each data subset ( $P < 0.05$ ). All 32 variables considered in this study

487 are shown in eFigure 2. In this figure, ASB represents artificially sweetened beverages and BF at

488 3M represents infant's breastfeeding status at three months (see methodology). (B) 14 bacterial

489 taxa identified as significant features associated with maternal consumption of ASB by DESeq2.

490

491 **TABLES**

492

493 **Table 1. Maternal consumption of ASB during pregnancy is associated with bacterial**  
 494 **community assembly during the first year of life.**

495 Permutational Analysis of Variance (PERMANOVA) of gut bacterial community composition  
 496 (Bray-Curtis dissimilarities) testing associations with different explanatory variables (a: all data,  
 497 b-e: clusters 1-4). The model on the complete dataset (ALL) accounts for repeated measures. The  
 498 set of variables to be tested was chosen based on results from univariate *envfit* models: infant  
 499 age, antibiotics received by mother at birth, mother's ethnicity, birth mode, breastfeeding status  
 500 at three months, presence of older siblings, and maternal ASB consumption.

501

| <b>Variables</b>               | <b>All<br/>(R<sup>2</sup> %)</b> | <b>Cluster 1<br/>(R<sup>2</sup> %)</b> | <b>Cluster 2<br/>(R<sup>2</sup> %)</b> | <b>Cluster 3<br/>(R<sup>2</sup> %)</b> | <b>Cluster 4<br/>(R<sup>2</sup> %)</b> |
|--------------------------------|----------------------------------|----------------------------------------|----------------------------------------|----------------------------------------|----------------------------------------|
| Infant age (3M vs. 12M)        | <b>7.3***</b>                    | <b>8.5*</b>                            | <b>4.1***</b>                          | <b>8.0***</b>                          | <b>3.9**</b>                           |
| Ethnicity                      | <b>2.5***</b>                    | NS                                     | NS                                     | NS                                     | NS                                     |
| Breastfeeding at 3M            | <b>1.9***</b>                    | <b>5.1**</b>                           | <b>5.0***</b>                          | <b>6.0*</b>                            | <b>6.4**</b>                           |
| Maternal Abx                   | <b>1.7***</b>                    | NS                                     | NS                                     | NS                                     | NS                                     |
| Birth mode                     | <b>0.8**</b>                     | NS                                     | NS                                     | NS                                     | NS                                     |
| Older siblings                 | NS                               | NS                                     | NS                                     | NS                                     | NS                                     |
| Infant secretor status         | NS                               | NS                                     | NS                                     | NS                                     | NS                                     |
| Maternal ASB                   | <b>0.7*</b>                      | NS                                     | <b>3.2**</b>                           | NS                                     | NS                                     |
| <b>Total R<sup>2</sup> (%)</b> | <b>15.1</b>                      | <b>13.6</b>                            | <b>9.1</b>                             | <b>14.0</b>                            | <b>10.3</b>                            |

<sup>NS</sup> P > 0.05, \* P < 0.05, \*\* P < 0.01, \*\*\* P < 0.001

502

503 **Table 2. Maternal consumption of ASB during pregnancy is associated with higher infant**  
 504 **BMI at one-year-old.**

505 Linear model showing the explanatory power of maternal ASB consumption on infant BMI z-  
 506 score at one year old, as well as the two main axes of ordination of bacterial community structure  
 507 (beta-diversity) on samples acquired at three and twelve-month-old. The full models are:

508 
$$\text{BMI at 1y} \sim \text{ASB} + \text{PCoA1} + \text{PCoA2}.$$

509 Microbial variables were transformed (squared root and order quantile normalized respectively)  
 510 to achieve normality. Here we present only the best model for 12 months fitted by stepwise  
 511 selection by Akaike information criterion because we detected no association between BMI at  
 512 one year old and microbiota composition at three months old.

513

| Variables                               | Infant BMI z-score at 1 year |                       |              |                |
|-----------------------------------------|------------------------------|-----------------------|--------------|----------------|
|                                         | $\beta$ -est.                | 95% CI                | P-value      | R <sup>2</sup> |
| Maternal ASB (daily vs. no consumption) | <b>0.42</b>                  | <b>[0.03,0.81]</b>    | <b>0.037</b> | <b>4.1%</b>    |
| <i>12 months microbiome</i>             |                              |                       |              |                |
| PCoA axis 1                             | <b>-0.71</b>                 | <b>[-1.40, -0.01]</b> | <b>0.048</b> | <b>3.9%</b>    |
| PCoA axis 2                             | NS                           | NS                    | NS           | NS             |
| <b>Total adj. R<sup>2</sup></b>         |                              | <b>8.1%</b>           |              |                |

514

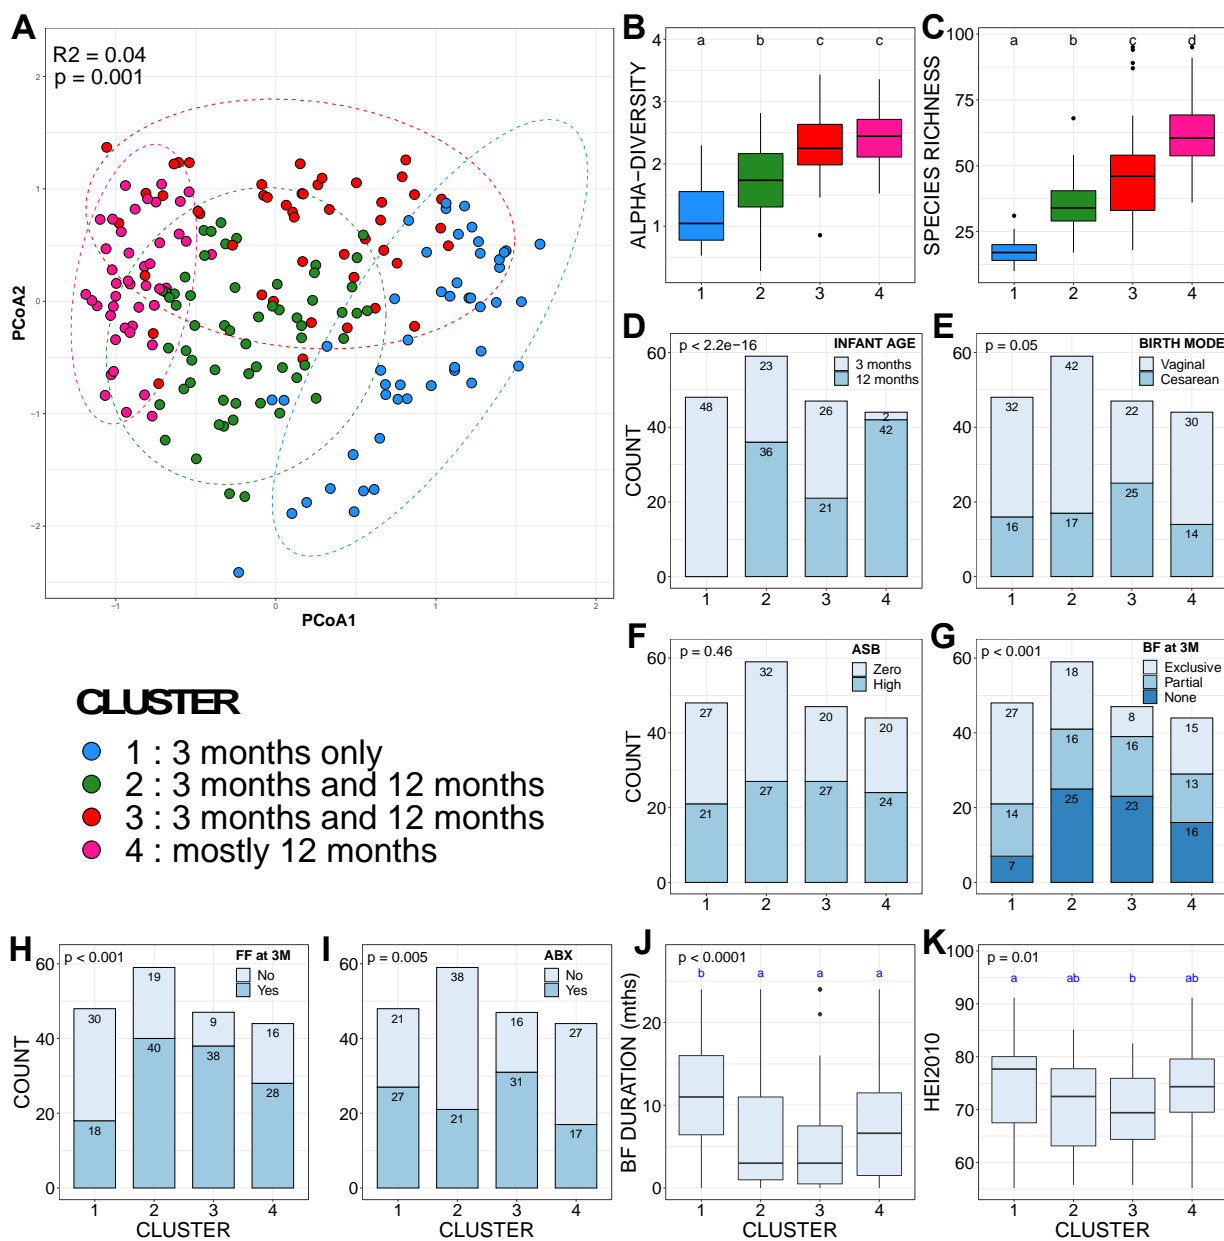

**Figure 1. Discrepancies in covariate distribution, alpha- and beta-diversity between clusters.**

(A) Principal component analysis (PCoA) ordinations of variation in beta-diversity of infant gut bacterial communities based on Bray-Curtis dissimilarities among samples. Ellipses represent 95% confidence intervals. (B-C) Box plots showing the alpha-diversity (richness and Shannon's diversity) per DMM cluster. The central line denotes the median, the boxes cover the 25th and 75th percentiles, and the whiskers extend to the most extreme data point, which is no more than 1.5 times the length of the box away from the box. Points outside the whiskers represent outlier samples. Letters denoted significant differences (non-parametric Kruskal-Wallis test followed by post-hoc test of Dunn with FDR correction following Benjamini-Hochberg method;  $P < 0.05$ ). (D-K) Variable distribution between clusters tested with non-parametric Kruskal-Wallis test

followed by either a post-hoc generalized linear model (glm) with a binomial/logistic distribution (D-I) or (J-K) a post-hoc Dunn test with FDR correction following Benjamini-Hochberg method. Minuscule letters indicate statistical differences between clusters from post-hoc generalized linear model (glm) with a binomial/logistic distribution. “BF at 3M” stands for “breastfeeding at three months” and “FF at 3M” for “formula feeding at three months”. Aside from maternal ASB consumption (F), only the variables that showed a statistical difference in distribution between clusters are presented. No differences were found for maternal age, ethnicity, education, diabetes; study site, household pets, siblings, or introduction of solid foods at 3 or 6 months. Cluster 1 included 48 samples from 48 infants; cluster 2 included 59 samples from 49 infants; cluster 3 included 47 samples from 39 infants; and cluster 4 included 44 samples from 43 infants. See methods for definition of variables.



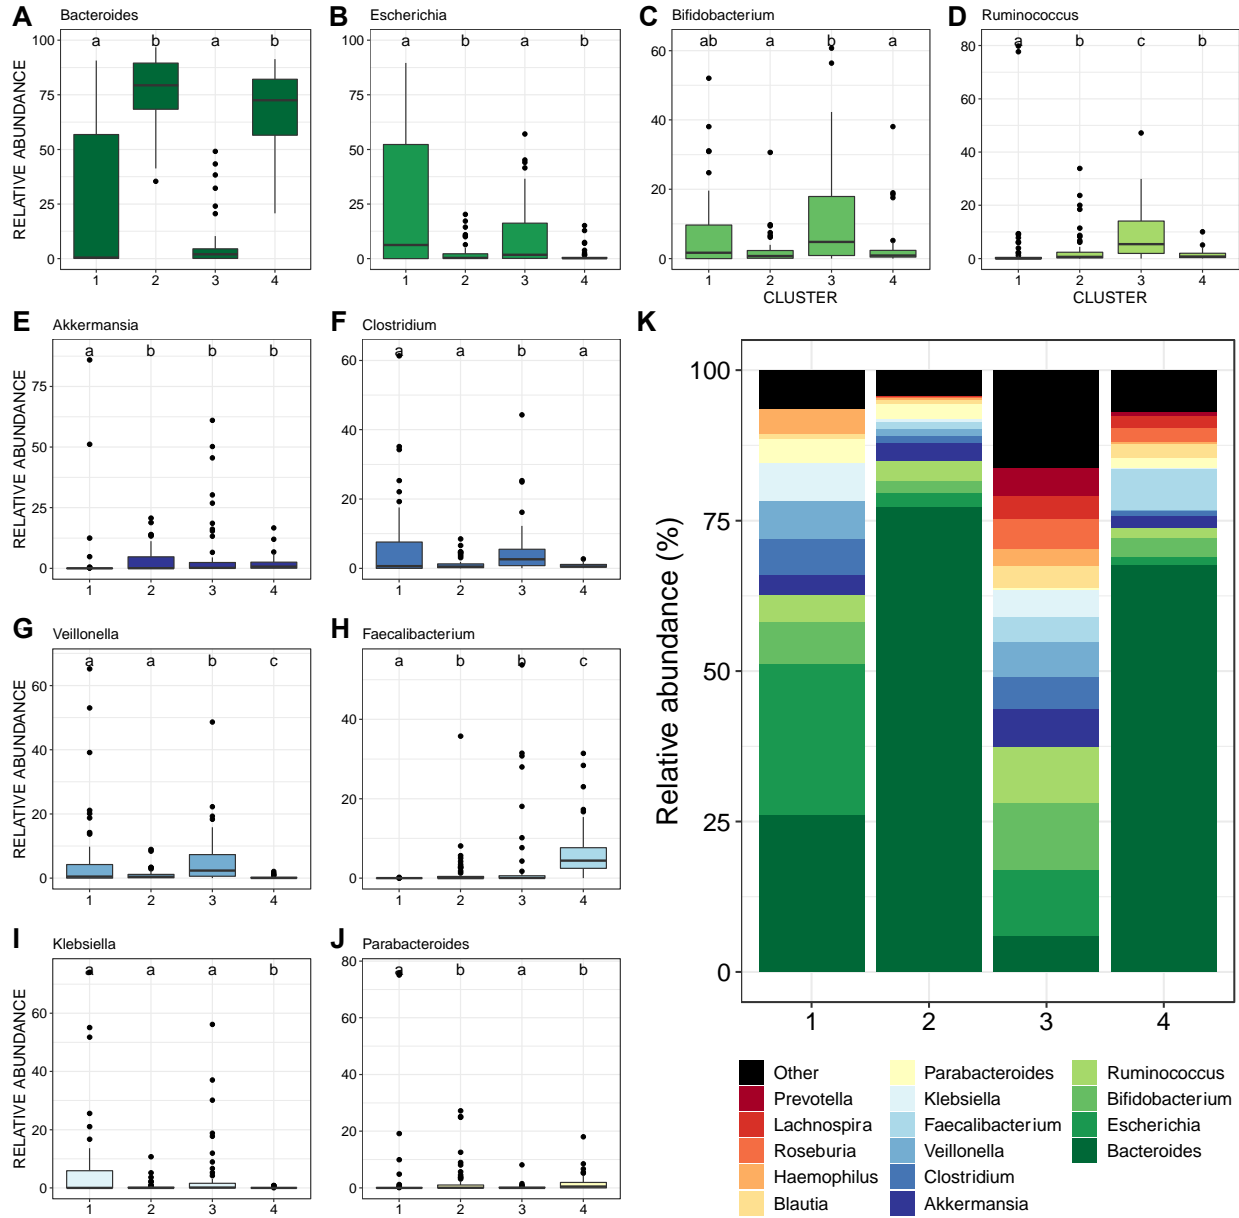

**Figure 2. Differences in relative abundances of the dominant bacterial genera between clusters.**

(A-J) Relative abundance across DMM clusters of the ten most dominant bacterial genera and (K) of the 15 most dominant bacterial genera. Letters indicate significant differences between clusters (non-parametric Kruskal-Wallis test, post-hoc Dunn test with Benjamini-Hochberg FDR correction). Cluster 1 contains only three months of age. Cluster 2 and 3 are composed of a mix three and twelve months of age, and Cluster 4 only 12M (except two samples).

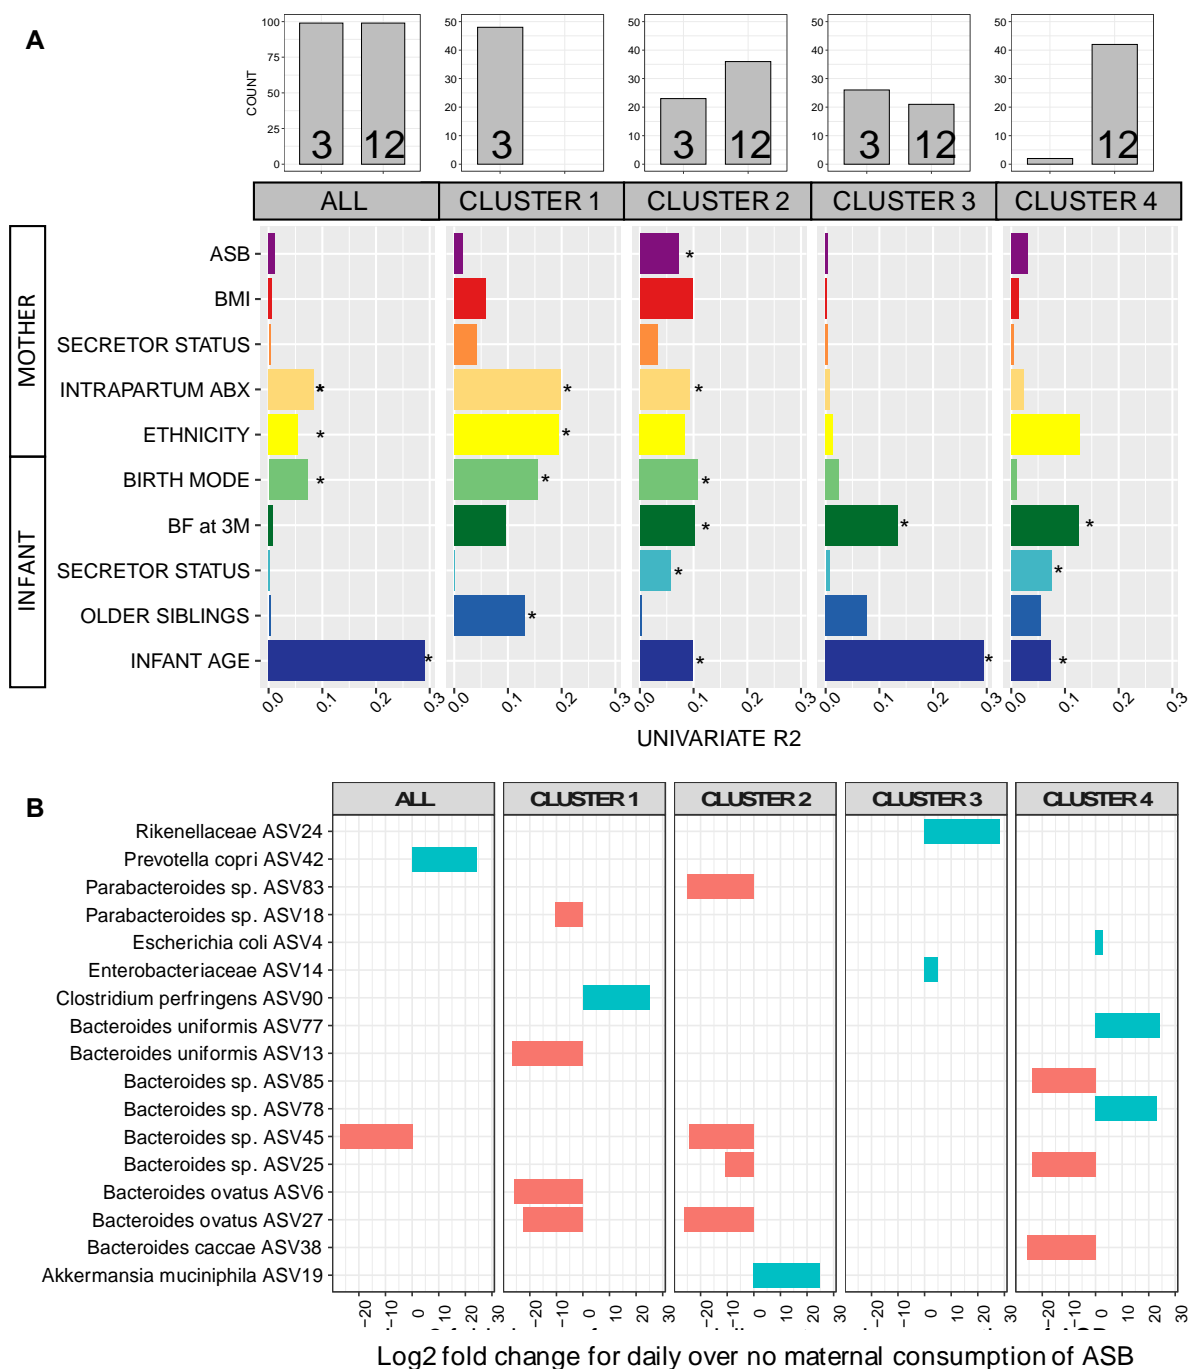

1  
2 **Figure 3. Drivers of gut bacterial beta-diversity and indicator taxa associated with**  
3 **maternal consumption of ASB differ between clusters.**

4 (A) Univariate models showing significance and explained variance of 10 variables on bacterial  
5 community structure across all data and each cluster subset. Horizontal bars show the amount of  
6 variance ( $R^2$ ) explained by each covariate in the model as determined by *envfit*. Asterisk denotes  
7 the significant covariates in each data subset ( $P < 0.05$ ). All 32 variables considered in this study  
8 are shown in Figure S2. In this figure, ASB represents artificially sweetened beverages and BF at  
9 3M represents infant's breastfeeding status at three months (see methodology). (B) 14 bacterial  
10 taxa identified as significant features associated with maternal consumption of ASB by DESeq2.
